# Supplementary material for: Cancer cell stiffening via CoQ10 and UBIAD1 regulates ECM signaling and ferroptosis in breast cancer
Source: PubMed Central journal article supplement — Nat Commun. 2024 Sep 18;15:8214. doi: 10.1038/s41467-024-52523-y (PMC11410950; doi:10.1038/s41467-024-52523-y), 2024-09-18

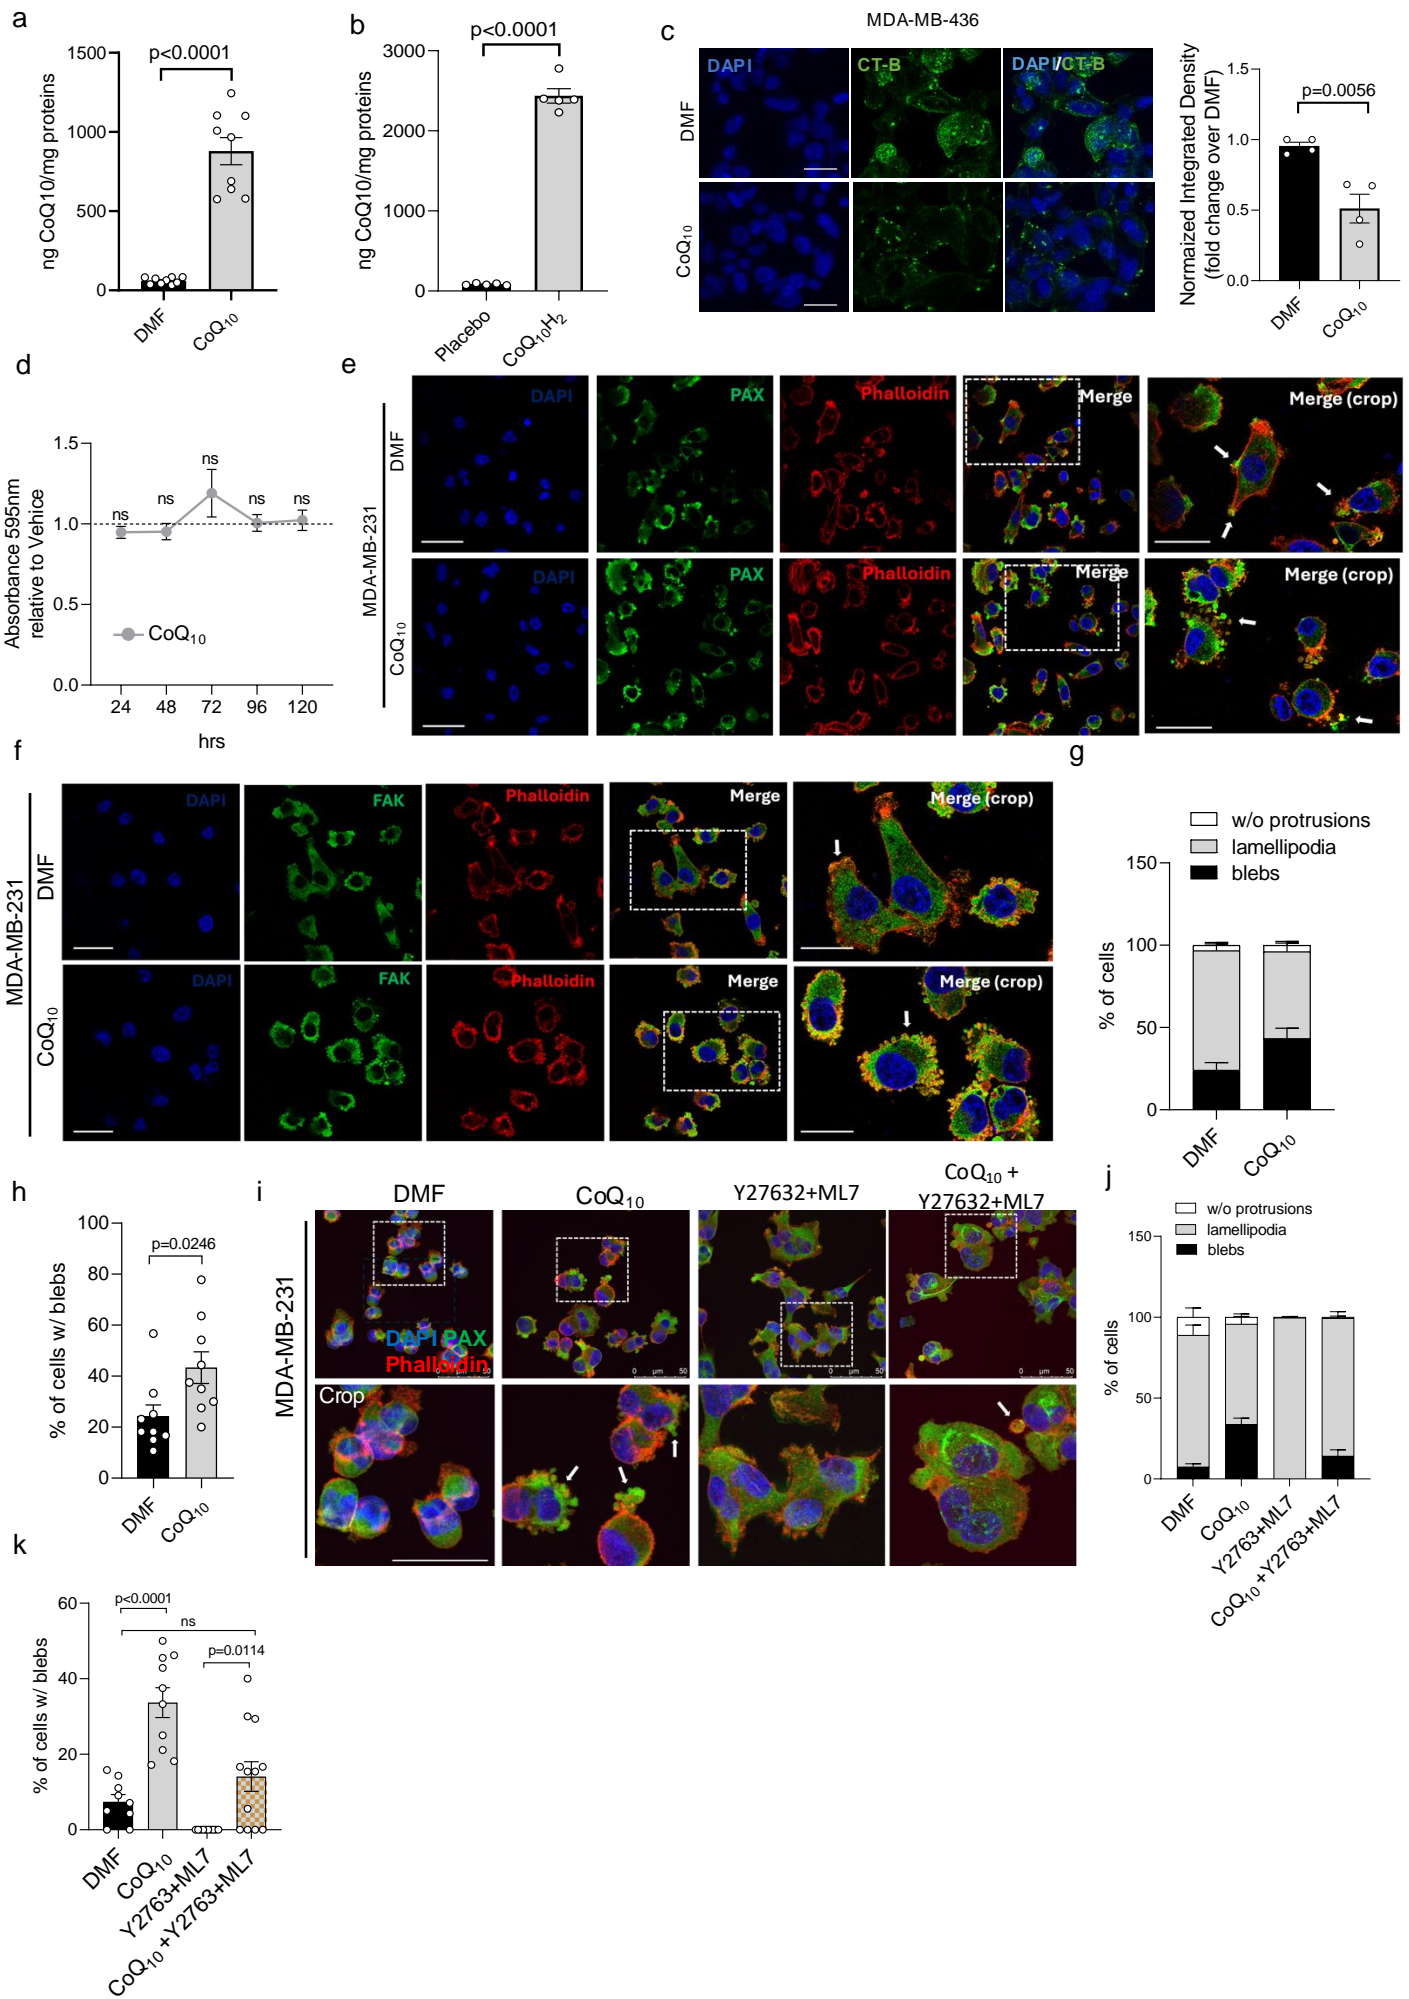

**Supplementary Fig. 1: CoQ<sub>10</sub> alters plasma membrane organization in BC cells.** **a, b** Total CoQ<sub>10</sub> in MDA-MB-231 treated with 20 $\mu$ M CoQ<sub>10</sub> or DMF (Vehicle) (**a**) and 20 $\mu$ M CoQ<sub>10</sub>H<sub>2</sub> or Placebo (Vehicle) (**b**). Values were normalized over mg of total proteins. Mean  $\pm$ SEM of n=9 in **a** and n=5 in **b** independent experiments. P-value from two-tailed un-paired t-test. **c** Lipid rafts (CT-B) in MDA-MB-436 cells treated with 20 $\mu$ M CoQ<sub>10</sub>. Quantification of Integrated density normalized over cell number. Mean  $\pm$ SEM of n=4 independent experiments. Data are expressed as fold change over DMF (Vehicle). P-value from two-tailed un-paired t-test. Scale bar, 25 $\mu$ m. DAPI (blue), CT-B (green). **d** MDA-MB-231 cell number at different timepoints upon treatment with Vehicle or 20 $\mu$ M CoQ<sub>10</sub>. Data are shown as absorbance (595nm) relative to Vehicle. Mean  $\pm$ SEM of n=3 independent experiments. P-value from one-sample two-tailed t-test comparing the mean of each timepoint with 1.0. ns, not significant. **e** Staining for Paxillin (PAX), DAPI and Phalloidin in MDA-MB-231 treated with DMF (Vehicle) vs. 20 $\mu$ M CoQ<sub>10</sub> (24h). Arrows: cell adhesions/blebbing structures. Scale bar, 60 $\mu$ m (Crop, 30 $\mu$ m). Cells were analyzed in n=5 independent experiments. **f** Staining for Focal Adhesion Kinase (FAK), DAPI and Phalloidin in MDA-MB-231 treated with DMF (Vehicle) vs. 20 $\mu$ M CoQ<sub>10</sub> (24h). Arrows: cell adhesions/blebbing structures. Scale bar, 60 $\mu$ m (Crop, 30 $\mu$ m). Cells were analyzed in n=4 independent experiments. **g, h** Percentage of cells without appreciable protrusions, with only lamellipodia or blebs (**g**), and percentage of cells with blebs (**h**). Each dot represents a field of ~20 cells stained for PAX or FAK and Phalloidin as in **e-f**. Mean  $\pm$ SEM of n=9 independent experiments. P-value from two-tailed un-paired t-test. **i** Staining for Paxillin (PAX) antibody, DAPI and Phalloidin in MDA-MB-231 treated with Vehicle (DMF), 20 $\mu$ M CoQ<sub>10</sub>, combinations of Y27632 (20 $\mu$ M) and ML7 (20 $\mu$ M)  $\pm$ CoQ<sub>10</sub> (24h). Arrows: bleb structures. Scale bar, 50 $\mu$ m. **j, k** Percentage of cells without appreciable protrusions, with only lamellipodia or blebs (**j**), and percentage of cells with blebs (**k**). Each dot represents a field of ~20 cells stained for PAX and Phalloidin as in **i**. Mean  $\pm$ SEM of n=12 independent experiments. Adjusted p-value from one-way Anova with Tukey's multiple comparisons test.

Source data are provided in Source Data file.

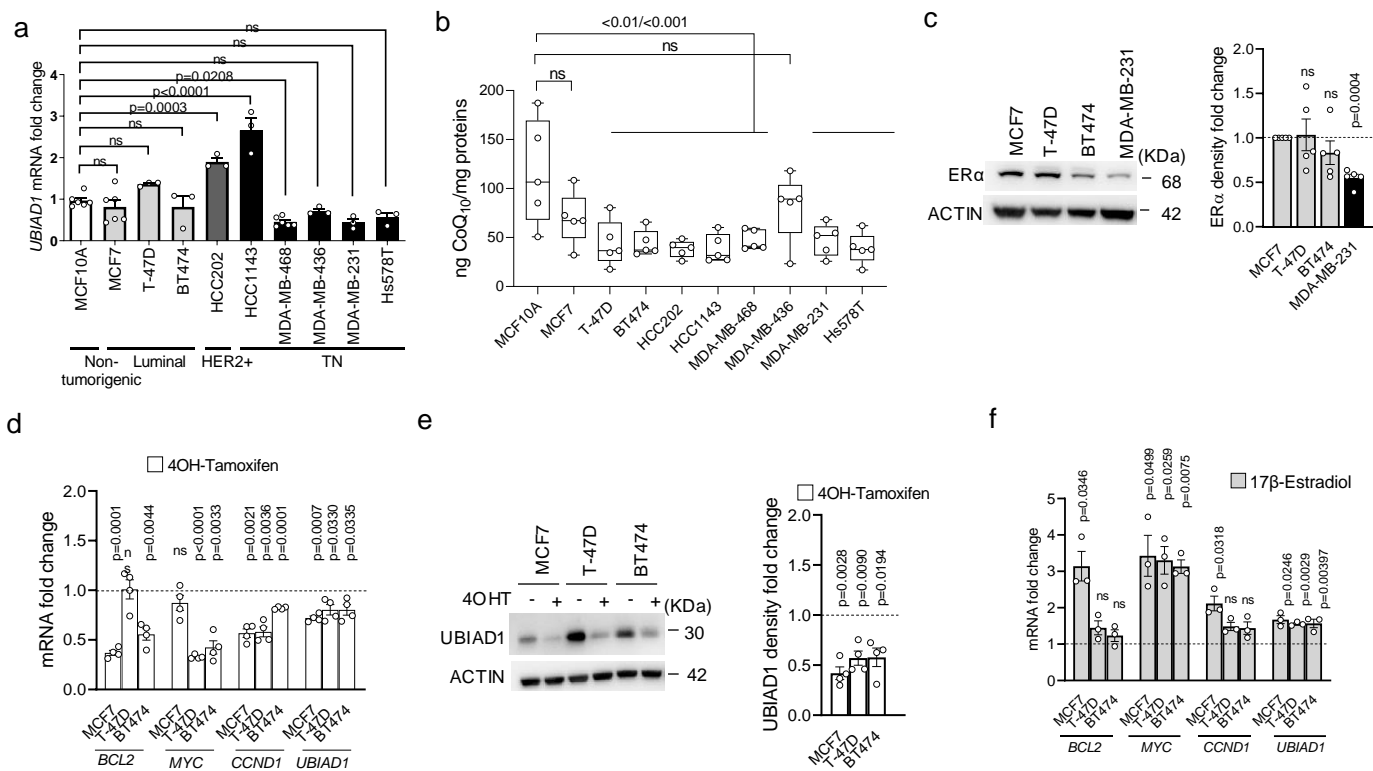

**Supplementary Fig. 2: Low UBIAD1 expression associates with worse clinical parameters in BC.** **a** qPCR analysis of UBIAD1 mRNA expression in a panel of human BC cell lines compared to non-tumorigenic breast cell line MCF10A. BC cell lines are organized according to the molecular subtype. Each dot represents an independent experiment. Data are shown as mean  $\pm$ SEM. Adjusted p-value from one-way Anova with Dunnett's multiple comparisons test (MCF10A as reference). ns, not significant; HER2+, HER2-positive; TN, triple-negative. **b** Mass spectrometry analysis of total CoQ<sub>10</sub> levels normalized over mg of proteins in the non-tumorigenic breast line MCF10A and a panel of BC cell lines. Mean  $\pm$ SEM on n=5 independent experiments. Adjusted p-value from one-way Anova with Tukey's multiple comparisons test. **c** ER $\alpha$  protein expression in luminal (MCF7, T-47D and BT474) and TN (MDA-MB-231) BC cell lines. Densitometry of ER $\alpha$  protein expression: each dot represents an independent experiment (n=5). Data were normalized over housekeeping (ACTIN) and expressed relative to MCF7. Mean  $\pm$ SEM. P-value from one-sample two-tailed t-test comparing the mean of each sample with 1.0. ns, not significant. **d** qPCR analysis of *BCL2*, *MYC*, *CCND1* and *UBIAD1* mRNA expression in ER $\alpha$ + BC cells treated with 4-Hydroxytamoxifen. Each dot represents an independent experiment (n=4). Data are shown as mean  $\pm$ SEM of 4OH-Tamoxifen-treated cells over Vehicle. P-value from one-sample two-tailed t-test comparing the mean of each sample with 1.0 (i.e., value set for Vehicle, dashed line). ns, not significant. **e** UBIAD1 protein expression in ER $\alpha$ + BC cells treated with 4-Hydroxytamoxifen (4OHT). Each dot represents an independent experiment (n=4). Data are shown as mean  $\pm$ SEM of 4OH-Tamoxifen-treated cells over Vehicle. P-value from one-sample two-tailed t-test comparing the mean of each sample with 1.0 (i.e., value set for Vehicle, dashed line). **f** qPCR analysis of *BCL2*, *MYC*, *CCND1* and *UBIAD1* mRNA expression in ER $\alpha$ + BC cells stimulated with 17 $\beta$ -Estradiol. Each dot represents an independent experiment (n=3). Data are shown as mean  $\pm$ SEM of 17 $\beta$ -Estradiol-stimulated cells over Vehicle. P-value from one-sample two-tailed t-test comparing the mean of each sample with 1.0 (i.e., value set for Vehicle, dashed line). ns, not significant.

Source data are provided in Source Data file.

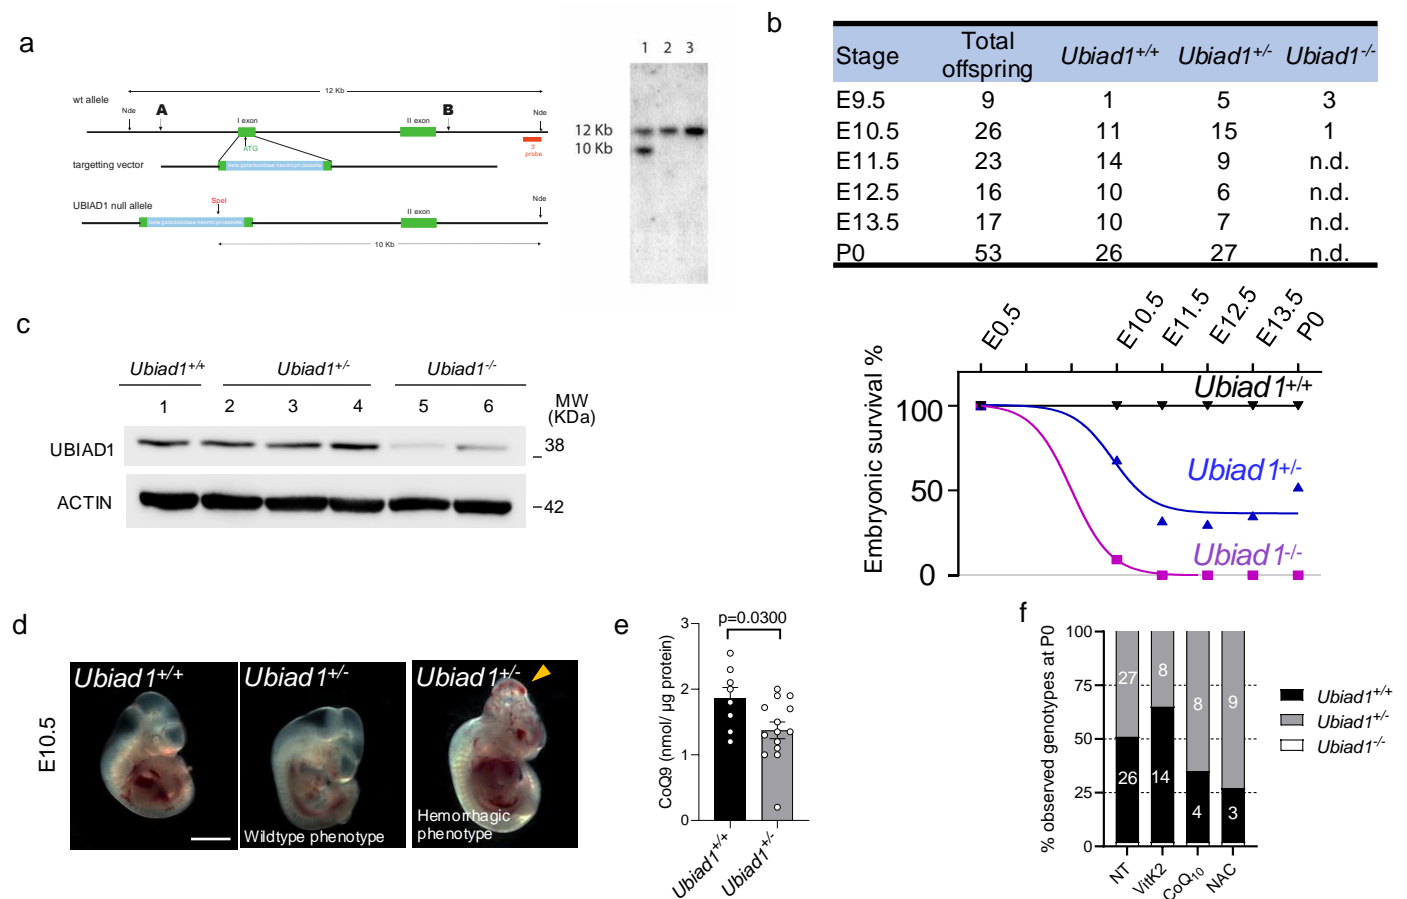

**Supplementary Fig. 3: Generation of *Ubiad1* knock-out mice.** **a** Schematic of *Ubiad1* targeting strategy. The start codon in the first exon of the *Ubiad1* gene was disrupted by the insertion of the b-galactosidase-neomycin resistance cassette by homologous recombination in mouse ES cells. A and B indicate the limit of the construct used to electroporate ES cell. SpeI in red, an artificial restriction site not present in wild type allele. Southern blot analysis on genomic DNA extracted from a recombinant (lane 1) and two wild-type clone (lane 2 ,3), digested with Nde-SpeI, and hybridized with the probe shown. **b** Distribution of mouse genotypes at different embryonic stages and after birth (P0). n.d., not detected. Below, Graphical representation of the data in the table, expressed as percentage of surviving embryos. The values were calculated based on the number of observed genotype frequency and theoretical frequency according to Mendelian genetics (25% *Ubiad1*<sup>+/+</sup>, 50% *Ubiad1*<sup>+/-</sup>, 25% *Ubiad1*<sup>-/-</sup>). **c** Western blot analysis of UBIAD1 protein expression in wildtype (*Ubiad1*<sup>+/+</sup>), *Ubiad1*<sup>+/-</sup> and *Ubiad1*<sup>-/-</sup> E9.5 embryos. **d** Images of E10.5 *Ubiad1*<sup>+/+</sup> and *Ubiad1*<sup>+/-</sup> embryos. About 30% of *Ubiad1*<sup>+/-</sup> embryos shows a hemorrhagic phenotype with cranial hemorrhages (arrowhead). Scale bar, 1mm. **e** Level of CoQ<sub>9</sub> was measured by Mass Spectrometry on whole E11.5 embryo lysate and normalized to protein concentration. Each dot represents a single embryo. Mean ± SEM. P-value was calculated using two-tailed un-paired t-test. **f** Percentage of genotypes detected in P0 pups after daily injection of Vehicle (NT), Vitamin K2 (VitK2, 150mg/kg), CoQ<sub>10</sub> (150mg/kg) and N-acetyl Cysteine (NAC, 150mg/kg) in the pregnant mother between day 2.5 and 10.5 of pregnancy. The number of pups obtained for each genotype is reported inside the corresponding box. Mating was set up crossing *Ubiad1*<sup>+/+</sup> males with *Ubiad1*<sup>-/-</sup> females.

Source data are provided in Source Data file.

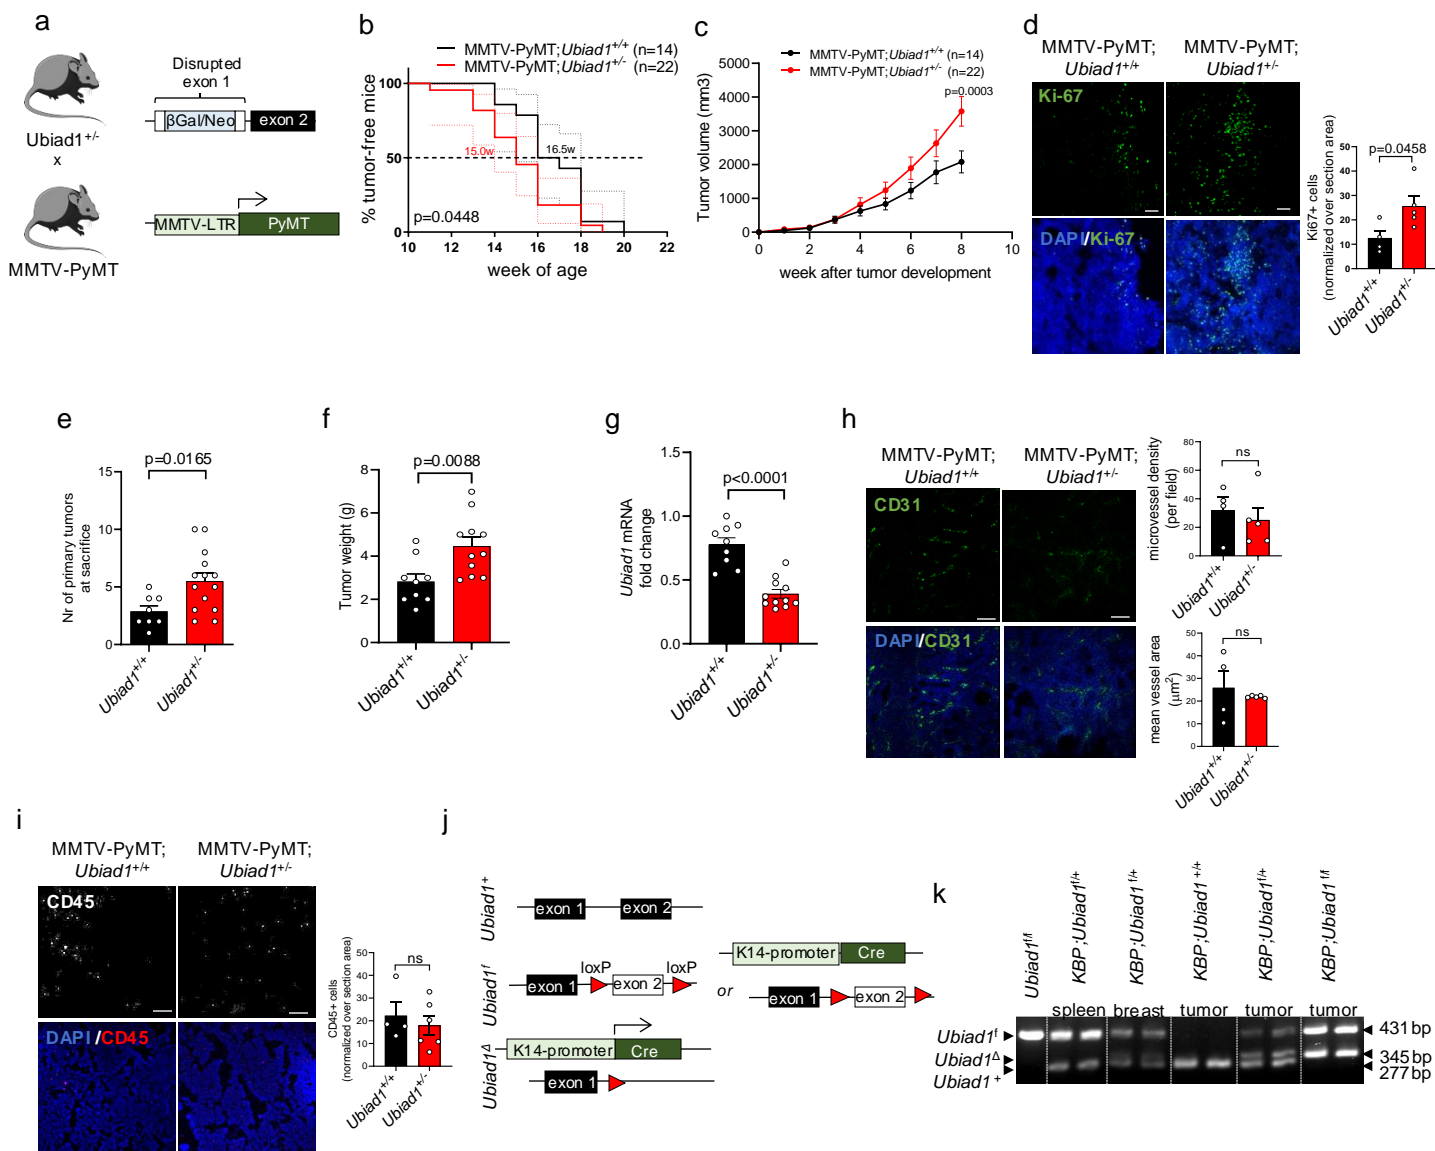

**Supplementary Fig. 4: UBIAD1 antagonizes BC development in mouse models.** **a** Generation of MMTV-PyMT spontaneous BC model with disruption of exon 1 of *Ubiad1*. **b** Tumor-free survival from birth until detection of a palpable tumor. MMTV-PyMT;*Ubiad1*<sup>+/+</sup> and MMTV-PyMT;*Ubiad1*<sup>+/-</sup> mice. Dashed lines: Confidence Interval. Group mean survival is reported. P-value from Gehan-Breslow-Wilcoxon test. **c** Tumor growth curves from detection of the first palpable tumor (week 0) until experimental endpoint (week 8). Tumor volume indicates the sum of all tumors per mouse. Each dot represents mean  $\pm$  SEM. Adjusted p-value from two-way Anova test with Sidak's multiple comparisons test. **d** Ki-67 and DAPI immunostaining in tumors from n=4 MMTV-PyMT;*Ubiad1*<sup>+/+</sup> and n=5 MMTV-PyMT;*Ubiad1*<sup>+/-</sup> mice. Scale bar, 100 $\mu$ m. Quantification shows mean  $\pm$  SEM. P-value from two-tailed un-paired t-test. **e** Number of mammary primary tumors developed per mouse. Data are shown as mean  $\pm$  SEM of n=8 MMTV-PyMT;*Ubiad1*<sup>+/+</sup> and n=14 MMTV-PyMT;*Ubiad1*<sup>+/-</sup> mice. P-value from two-tailed un-paired t-test. **f** Total tumor weight at experimental endpoint. Data are shown as mean  $\pm$  SEM of n=9 MMTV-PyMT;*Ubiad1*<sup>+/+</sup> and n=11 MMTV-PyMT;*Ubiad1*<sup>+/-</sup> mice. P-value from two-tailed un-paired t-test. **g** *Ubiad1* mRNA expression in tumor samples from n=9 MMTV-PyMT;*Ubiad1*<sup>+/+</sup> and n=11 MMTV-PyMT;*Ubiad1*<sup>+/-</sup> mice. Data are shown as mean  $\pm$  SEM. P-value from two-tailed un-paired t-test. **h** CD31-positive cells in tumors from n=4 MMTV-PyMT;*Ubiad1*<sup>+/+</sup> and n=5 MMTV-PyMT;*Ubiad1*<sup>+/-</sup> mice, counterstained with DAPI. Scale bar, 100 $\mu$ m. Quantification of micro-vessel density per field and vessel area on the right (at least four fields/sample). Data are shown as mean  $\pm$  SEM. P-value from two-tailed un-paired t-test. ns, not significant. **i** CD45-positive cells (white/red) in tumors from n=4 MMTV-PyMT;*Ubiad1*<sup>+/+</sup> and n=6 MMTV-PyMT;*Ubiad1*<sup>+/-</sup> mice counterstained with DAPI. Scale bar, 100 $\mu$ m. Quantification of CD45+ cells normalized over section area of at least four fields/sample. Data are shown as mean  $\pm$  SEM. P-value from two-tailed un-paired t-test. ns, not significant. **j** Schematic showing *Ubiad1* wildtype gene "*Ubiad1*<sup>+/+</sup>"; *Ubiad1* gene without recombination with exon 2 flanked by lox-P sites "*Ubiad1*<sup>fl/fl</sup>" (K14Cre absent or Cre recombinase not expressed); *Ubiad1* gene with deletion of exon 2 "*Ubiad1* <sup>$\Delta$</sup> ". **k** PCR of genomic DNA of *Ubiad1*<sup>fl/fl</sup>, KBP;KBP;*Ubiad1*<sup>+/+</sup>, KBP;*Ubiad1*<sup>fl/fl</sup> and KBP;*Ubiad1*<sup>fl/fl</sup> mouse tissues. Spleen was used as negative control for the recombination. Source data are provided in Source Data file.

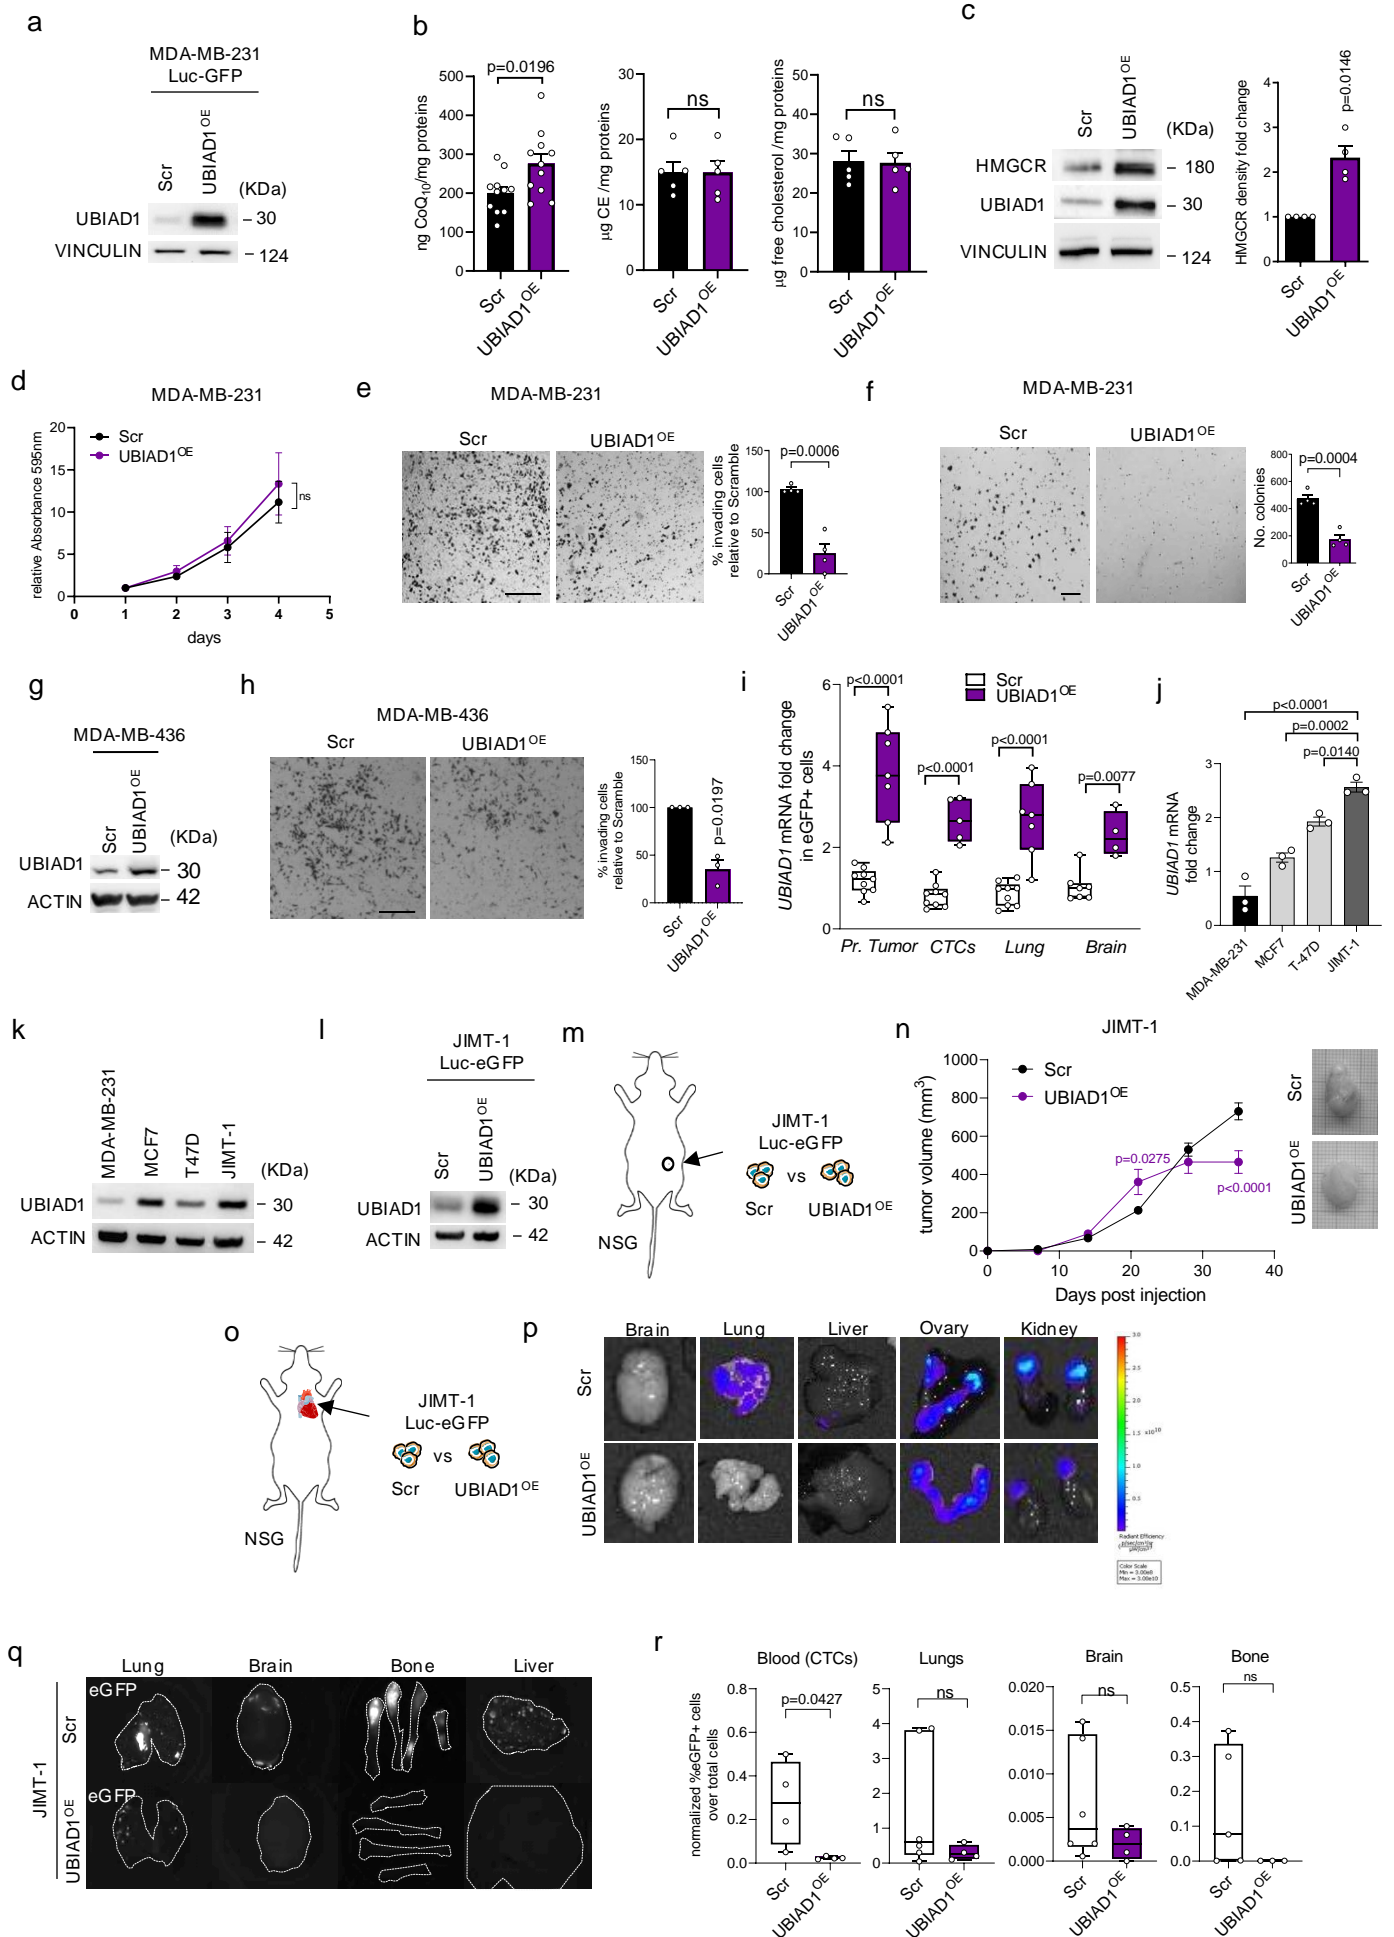

**Supplementary Fig. 5: UBIAD1 regulates BC aggressiveness *in vivo*.** **a** UBIAD1 levels in MDA-MB-231 UBIAD1 overexpressing (UBIAD1<sup>OE</sup>) cells compared to control. VINCULIN was used as loading control. N=3 independent experiments. **b** CoQ<sub>10</sub>, cholesterol esters (CE) and free cholesterol levels. Each dot represents an independent experiment. Mean ±SEM. P-value from two-tailed un-paired t-test. ns, not significant. **c** HMGCR protein expression. Each dot represents an independent experiment. Mean ±SEM. P-value from one-sample two-tailed t-test comparing the mean of UBIAD1<sup>OE</sup> with 1.0. **d** Cell proliferation assay. Each point represents the mean ±SEM of n=4 independent experiments. Adjusted p-value from two-way Anova. ns, not significant. **e** Invading cells. Scale bar, 300µm. Data are expressed as percentage of invading cells compared to Scr (100%). Data are mean ±SEM of n=4 independent experiments. P-value from two-tailed un-paired t-test. **f** Soft agar assay. Scale bar, 600µm. Data are mean ±SEM of n=4 independent experiments. P-value from two-tailed un-paired t-test. **g** UBIAD1 levels in Scr vs. UBIAD1<sup>OE</sup> MDA-MB-436 cells. N=3 independent experiments. **h** Invading cells. Scale bar, 300µm. Data are expressed as percentage of invading cells compared to Scr (100%). Data are mean ±SEM of n=3 independent experiments. P-value from one-sample two-tailed t-test comparing the mean of UBIAD1<sup>OE</sup> with 1.0. **i** UBIAD1 mRNA expression in eGFP+ cells from whole blood (CTCs), primary tumors (Pr. Tumors), lung and brain of mice injected with MDA-MB-231 Scr and UBIAD1<sup>OE</sup> cells. Each dot represents a single organ. Data are mean ±SEM. Adjusted p-value from one-way Anova with Sidak's multiple comparisons test. qPCR (**j**) and Western blot (**k**) of UBIAD1 mRNA and protein expression in human BC cell lines. Data are mean ±SEM of n=3 independent experiments. Adjusted p-value from one-way Anova with Dunnett's multiple comparisons test. ACTIN was used as loading control. **l** UBIAD1 levels UBIAD1<sup>OE</sup> JIMT-1 Luciferase-eGFP+ cells. **m** schematic of injection in the fat pad of the 4<sup>th</sup> mammary gland of Scr and UBIAD1<sup>OE</sup> JIMT-1 Luciferase-eGFP cells. **n** Representative growth curve and pictures of tumors from Scr (n=5) vs. UBIAD1<sup>OE</sup> (n=4) JIMT-1 cells injected. Data are mean ±SEM. Adjusted p-value from two-way Anova with Sidak's multiple comparisons test. **o** schematic of Intracardiac injection. **p,q** eGFP signal of JIMT-1-derived metastasis in distal organs (n=4 mice/group). **r** Percentage of eGFP+ cells over total cells in whole blood (CTCs) and dissociated lungs, brain and bone (Gating: eGFP+ cells from Single\_cell\_2). Each dot represents a single organ/blood sample. Data are mean ±SEM. P-value from two-tailed un-paired t-test. ns, not significant.

Source data are provided in Source Data file.

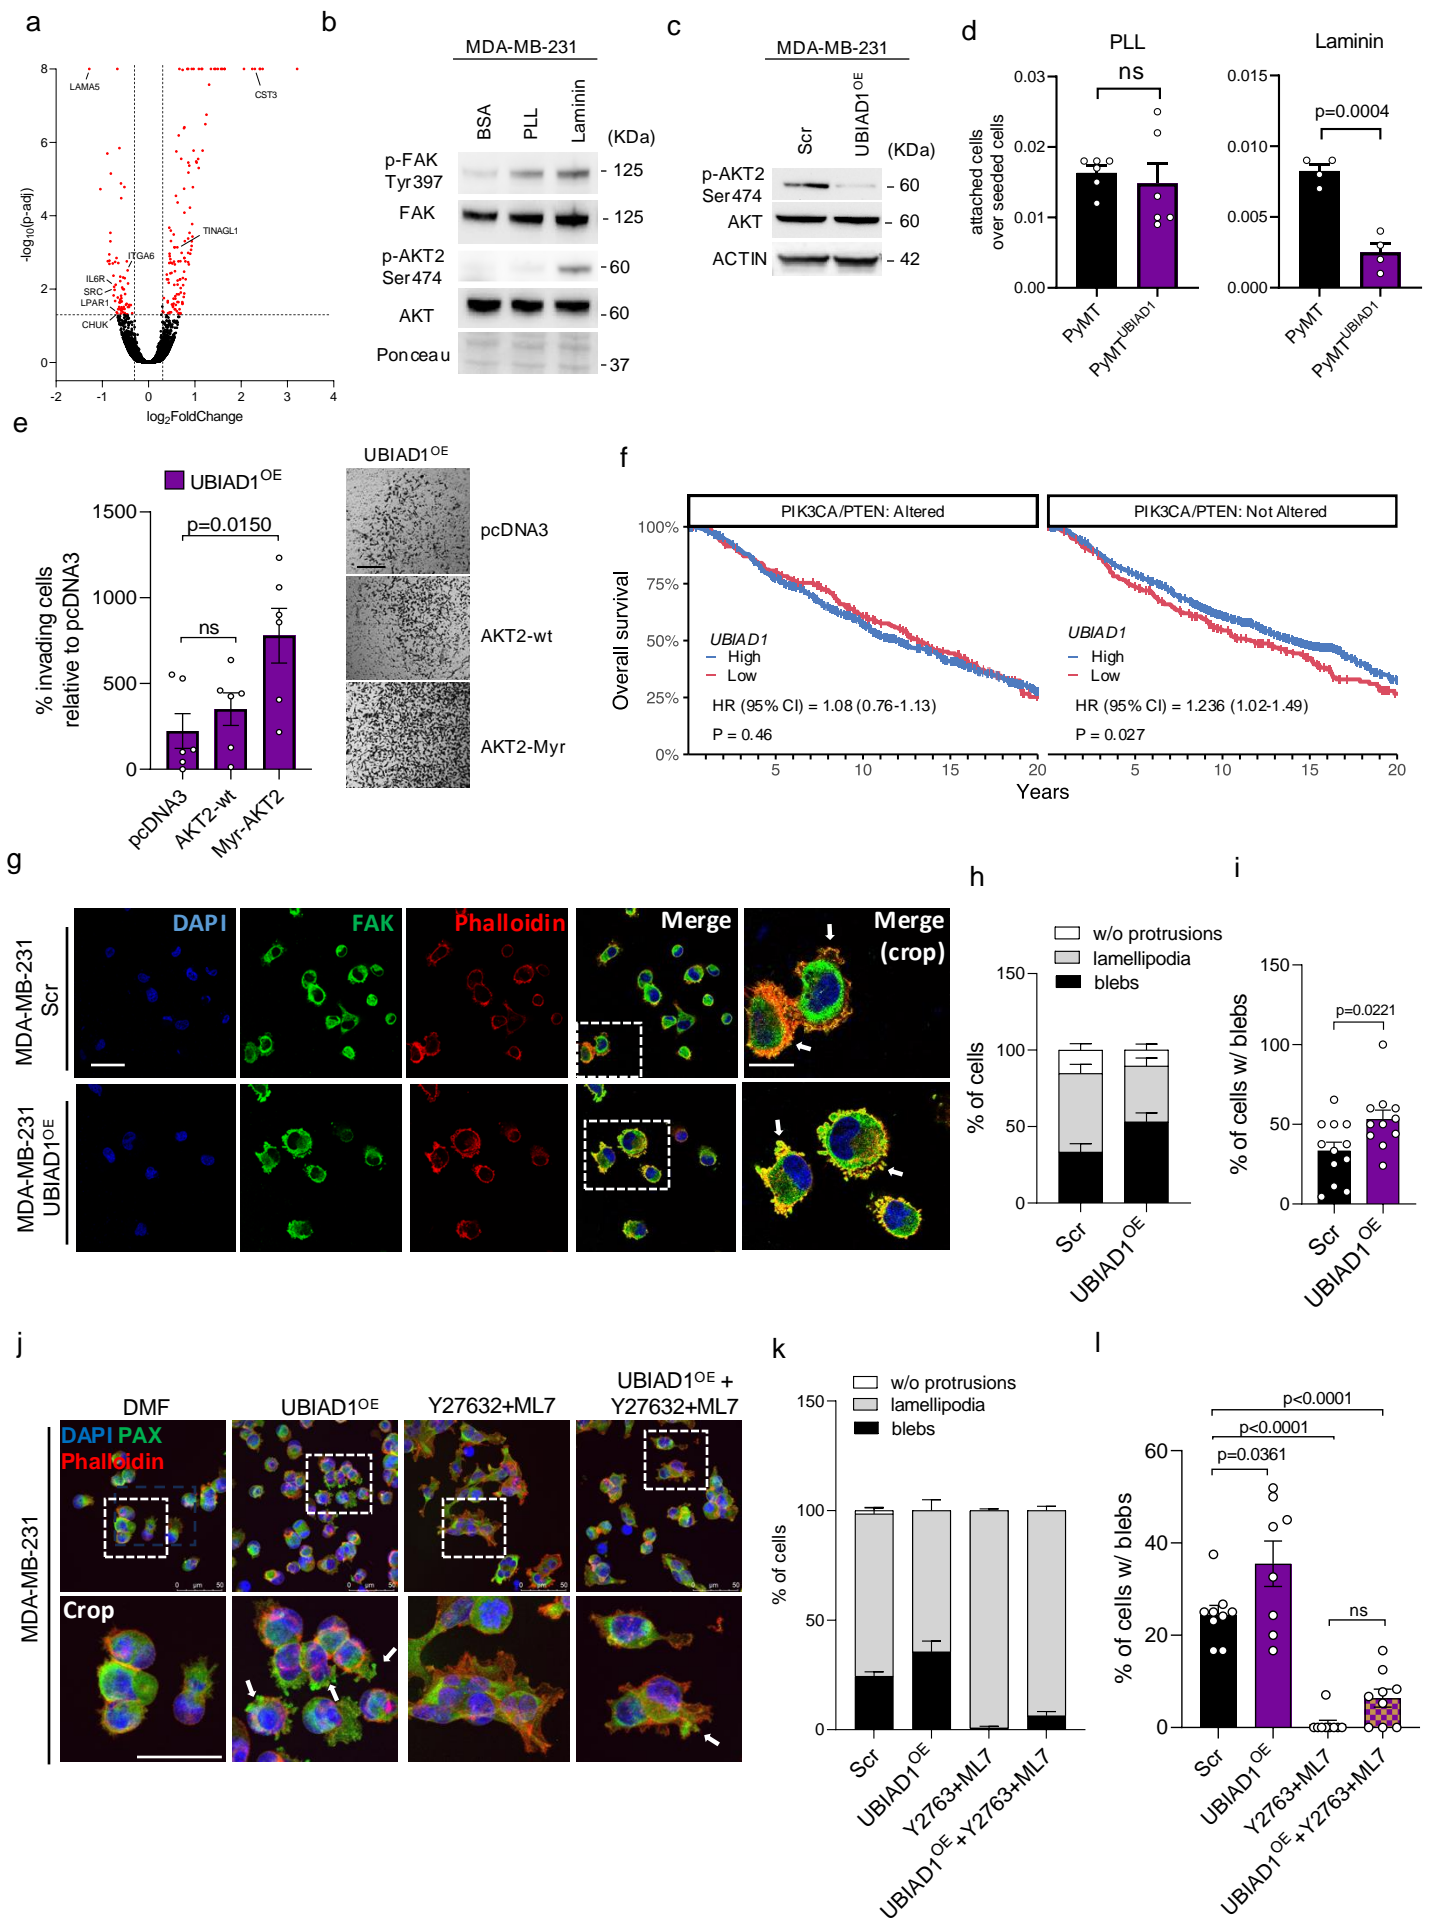



**Supplementary Fig. 6: UBIAD1 expression affects ECM signaling and response in BC cells.** **a** Volcano Plot shows the differentially expressed genes between MDA-MB-231Scr and UBIAD1<sup>OE</sup> (red). Genes listed in the main text are highlighted. **b** Phospho-FAK (Tyr397) and phospho-AKT2 (Ser474) levels after cell attachment on Poly-L-lysine (PLL), Laminin or not-attached cells (BSA). Ponceau was used as loading control. N=2 independent experiments. **c** Phospho-AKT2 (Ser474) in standard culture conditions. Densitometry of phosphorylated over total protein. ACTIN was used as loading control. N=3 independent experiments. **d** Cell adhesion assay of MMTV-PyMT-derived Scramble (PyMT) and UBIAD1-overexpressing (PyMT<sup>UBIAD1</sup>) *ex vivo* cultures. PLL, Poly-L-Lysine. Data are shown as ratio of attached over total seeded cells. Each dot represents an independent experiment. Mean  $\pm$ SEM. P-value from two-tailed un-paired t-test. ns, not significant. **e** Invasion assay of MDA-MB-231 UBIAD1<sup>OE</sup> cells. Cells were transfected with empty plasmid (pcDNA3), plasmid encoding AKT2-wildtype (AKT2-wt), or plasmid encoding Myristylated-AKT2 (Myr-AKT2). Data are expressed as percentage of invading cells relative to pcDNA3 (100%). Data are mean  $\pm$ SEM of n=6 independent experiments. Adjusted p-value from one-way Anova with Tukey's multiple comparisons test. Scale bar, 300 $\mu$ m. **f** Kaplan-Meier analysis of overall survival in METABRIC BC patients subgrouped based on PIK3CA and PTEN mutations and stratified according to *UBIAD1* mRNA expression (Low: <25th percentile; High:  $\geq$ 25th percentile). HR, hazard ratio; CI, confidence intervals. P, Log-rank test p-value. **g** Focal Adhesion Kinase (FAK), DAPI and Phalloidin stainings. Arrows: cell adhesions or blebbing structures. Scale bar, 60 $\mu$ m (Crop, 30 $\mu$ m). **h, i** Percentage of cells without protrusions, with lamellipodia or blebs (**h**), and the percentage of cells with blebs (**i**). Each dot represents a field of  $\sim$ 20 cells stained as in **i**. Mean  $\pm$ SEM of n=12 independent seedings. P-value from two-tailed un-paired t-test. **j** Paxillin (PAX), DAPI (nuclei) and Phalloidin stainings in cells treated with Vehicle (DMF) or the combination of Y27632 and ML7 inhibitors (24h). Arrows: bleb structures. Scale bar, 50 $\mu$ m. **k, l** Percentage of cells without protrusions, with lamellipodia or blebs (**k**), and the percentage of cells with blebs (**l**). Each dot represents a field of  $\sim$ 20 cells stained as in **j**. Mean  $\pm$ SEM of n=9 independent seedings. Adjusted p-value from one-way Anova with Tukey's multiple comparisons test.

Source data are provided in Source Data file.

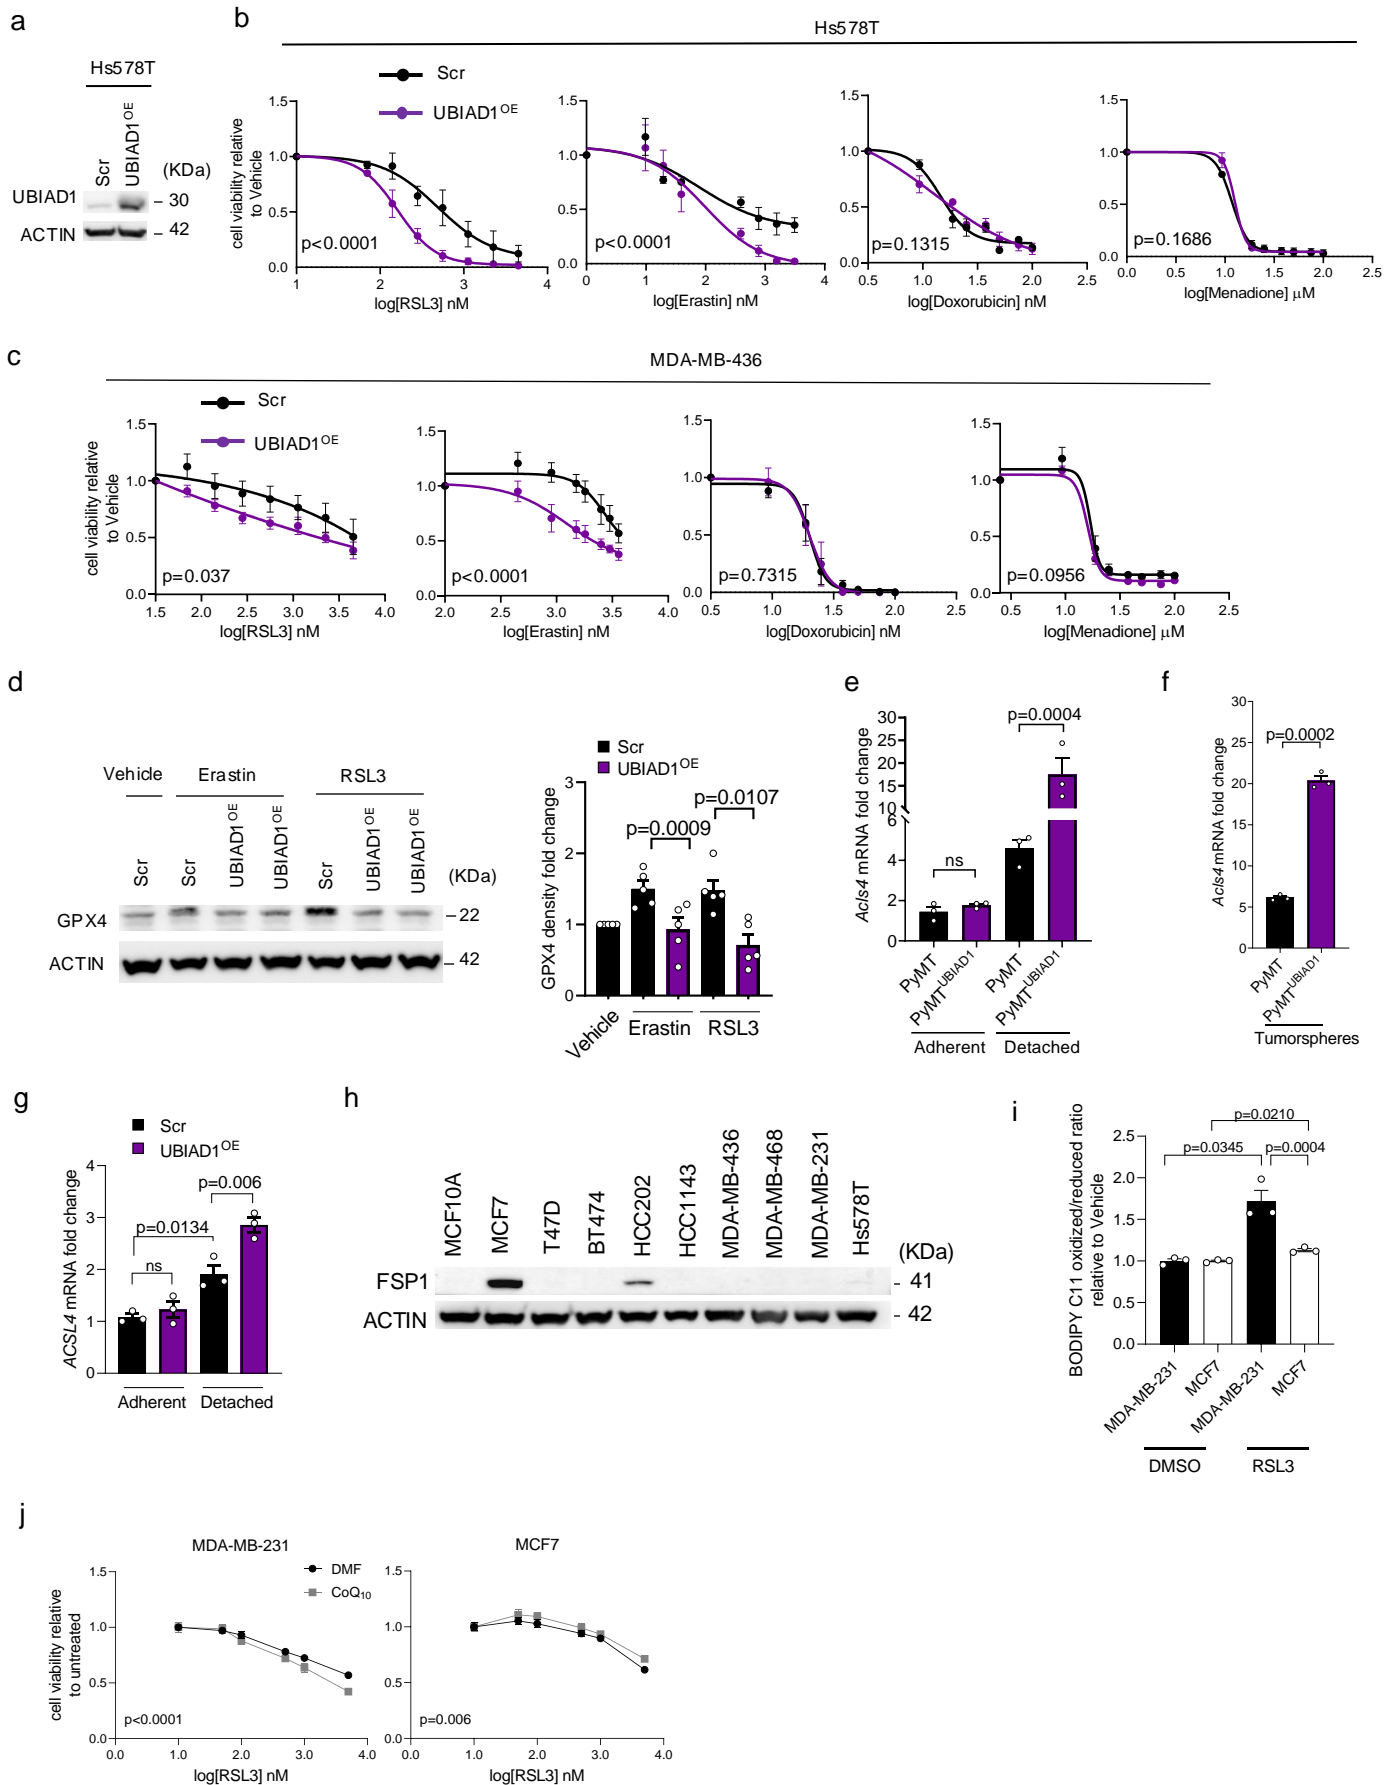

**Supplementary Fig. 7: UBIAD1 regulates ferroptosis responses in BC cells.** **a** UBIAD1 expression in Hs578T Scramble (Scr) and UBIAD1-overexpressing (UBIAD1<sup>OE</sup>) cells. ACTIN was used as loading control. **b-c** Sensitivity to RSL3, Erastin, Doxorubicin and Menadione. Cells were treated for 24h with increasing concentrations of each drug; viability was expressed relative to vehicle-treated cells. Data as mean  $\pm$ SEM of n=5 independent experiments. P-value from two-way Anova. **d** GPX4 protein expression in MDA-MB-231 Scr vs. UBIAD1<sup>OE</sup> cells treated with vehicle (DMSO), 0.9 $\mu$ M ERASTIN or 0.45 $\mu$ M RSL3 (24h). ACTIN was used as loading control. Densitometry of GPX4 protein expression: data were normalized over housekeeping (ACTIN) and expressed relative to vehicle. Mean  $\pm$ SEM of n=5 independent experiments. Adjusted p-value from one-way Anova with Sidak's multiple comparisons test. ns, not significant. **e** *Acs/4* mRNA expression in adherent or detached PyMT *ex vivo* cell cultures. Scramble (PyMT) and UBIAD1-overexpressing (PyMT<sup>UBIAD1</sup>). Each dot represents a biological replicate. Mean  $\pm$ SEM. Adjusted p-value from one-way Anova with Sidak's multiple comparisons test. ns, not significant. **f** qPCR for *Acs/4* mRNA expression in 5-day tumorspheres from PyMT or PyMT<sup>UBIAD1</sup> *ex vivo* cell cultures. Each dot represents an independent experiment. Mean  $\pm$ SEM. P-value was calculated using two-tailed un-paired t-test. **g** qPCR for *ACSL4* mRNA expression in adherent or 48h detached MDA-MB-231 Scr vs. UBIAD1<sup>OE</sup> cells. Mean  $\pm$ SEM of n=3 independent experiments. Adjusted p-value from one-way Anova with Tukey's multiple comparisons test. ns, not significant. **h** FSP1 protein expression in different BC cell lines and non-tumorigenic MCF10A. ACTIN was used as loading control. **i**, Lipid peroxidation analysis in cells treated with vehicle (DMSO) or with 0.45 $\mu$ M RSL3 (12h). The fluorescent signal was quantified as ratio of oxidized/reduced BODIPY C11 (Gating: P1-Live\_Cells-FITC/PE). Data are expressed as fold change over vehicle-treated cells. Mean  $\pm$ SEM of n=3 independent experiments. Adjusted p-value from one-way Anova with Sidak's multiple comparisons test. **j** Sensitivity to RSL3 in cells treated for 12h. Cell viability was expressed relative to vehicle-treated cells. Data are mean  $\pm$ SEM of n=6 independent experiments. P-value from two-way Anova.

Source data are provided in Source Data file.

Supplementary Table 1

| Variable      | ALL | UBIAD1 status     |                  | OR<br>(95% CI)   | P-value |
|---------------|-----|-------------------|------------------|------------------|---------|
|               |     | High<br>N (% row) | Low<br>N (% row) |                  |         |
| <b>pT</b>     |     |                   |                  |                  |         |
| pT1a/b        | 46  | 23 (50%)          | 23 (50%)         | Ref.             |         |
| pT1c          | 278 | 74 (26.6%)        | 204 (73.4%)      | 2.76 (1.46:5.21) | 0.0027  |
| pT2           | 216 | 56 (25.9%)        | 160 (74.1%)      | 2.86 (1.49:5.49) | 0.0023  |
| pT3/pT4       | 26  | 5 (19.2%)         | 21 (80.8%)       | 4.2 (1.35:13.05) | 0.0124  |
| <b>Grade</b>  |     |                   |                  |                  |         |
| G1            | 75  | 32 (42.7%)        | 43 (57.3%)       | Ref.             |         |
| G2            | 62  | 69 (30.1%)        | 160 (69.9%)      | 1.80 (1.19:2.73) | 0.0073  |
| G3            | 242 | 50 (20.7%)        | 192 (79.3%)      | 2.86 (1.64:4.97) | 0.0003  |
| <b>ER/PGR</b> |     |                   |                  |                  |         |
| Not expr.     | 79  | 14 (17.7%)        | 65 (82.3%)       | Ref.             |         |
| Expr.         | 487 | 144 (29.6%)       | 343 (70.4%)      | 0.51 (0.28:0.94) | 0.031   |
| <b>Ki-67</b>  |     |                   |                  |                  |         |
| <14%          | 130 | 49 (37.7%)        | 81 (62.3%)       | Ref.             |         |
| ≥14%          | 434 | 109 (25.1%)       | 325 (74.9%)      | 1.80 (1.19:2.73) | 0.0073  |

Association between UBIAD1 status (High, Low) and the clinical and pathological parameters, pT, Grade, ER/PGR, Ki-67. Only significant parameters are shown; see also Figure S1A for the not significant ones. pT, tumor size: pT1a/b <1 cm; pT1c >1 cm and <2 cm; pT2. >2 cm and <3 cm; pT3/4 >3 cm; Grade, grade of differentiation; ER, estrogen receptor; PGR, progesterone receptor; Ki-67, proliferative index. OR, odds ratio. Ref, reference. P-value, Fisher's exact test. The number and percentage of patients in each group are shown.

Supplementary Table 2

| Variable     | ALL | UBIAD1 status     |                  | OR<br>(95% CI)      | P-<br>value |
|--------------|-----|-------------------|------------------|---------------------|-------------|
|              |     | High<br>N (% row) | Low<br>N (% row) |                     |             |
| <b>pN</b>    |     |                   |                  |                     |             |
| pN0          | 238 | 69 (29.0%)        | 169 (71.0%)      | Ref.                |             |
| pN+          | 311 | 82 (26.4%)        | 229 (73.6%)      | 1.14<br>(0.78:1.66) | 0.50        |
| <b>HER2</b>  |     |                   |                  |                     |             |
| Negative     | 484 | 133 (27.5%)       | 351 (72.5%)      | Ref.                |             |
| Positive     | 72  | 20 (27.8%)        | 52 (72.2%)       | 0.99<br>(0.57:1.71) | 0.99        |
| <b>Age</b>   |     |                   |                  |                     |             |
| <50<br>years | 244 | 72 (29.5%)        | 172 (70.5%)      | Ref.                |             |
| ≥50<br>years | 322 | 86 (26.7%)        | 236 (73.3%)      | 1.15<br>(0.79:1.66) | 0.51        |

Association between UBIAD1 status (High, Low) and molecular subtypes. HER2+, HER2-positive; TN, triple-negative. OR, odds ratio; CI, confidence intervals. P-value, Fisher's exact test. The number and percentage of patients in each group are shown.

**Supplementary Table 3**

| <b>Molecular subtype</b> | <b>High</b>         | <b>Low</b>         | <b>Total</b> | <b>OR (95% CI)</b> | <b>P-value</b> |
|--------------------------|---------------------|--------------------|--------------|--------------------|----------------|
| Luminal A                | 550 (79.4%)         | 143 (20.6%)        | 693          | Ref.               |                |
| Luminal B                | 377 (80.4%)         | 92 (19.6%)         | 469          | 0.94 (0.7-1.26)    | 0.671          |
| HER2+                    | 184 (79.3%)         | 48 (20.7%)         | 232          | 1.00 (0.7-1.45)    | 0.986          |
| Basal                    | 176 (58.3%)         | 126 (41.7%)        | 302          | 2.75 (2.05-3.69)   | 5.75e-12       |
| Other                    | 123 (65.1%)         | 66 (34.9%)         | 189          | 2.06 (1.45-2.93)   | 4.24e-05       |
| <b>All</b>               | <b>1410 (74.8%)</b> | <b>475 (25.2%)</b> | <b>1885</b>  |                    |                |

Association between UBIAD1 mRNA expression levels (High and Low) and PAM50 subtypes in the METABRIC cohort. OR, odds ratio; CI, confidence intervals. P-value, Fisher's exact test. The number and percentage of patients in each group are shown.

## Supplementary Table 4

| Enrichment FDR | nGenes | Pathway Genes | Fold Enrichment | Pathways                               | Genes                                                                                              |
|----------------|--------|---------------|-----------------|----------------------------------------|----------------------------------------------------------------------------------------------------|
| 0.0067         | 17     | 530           | 3,1             | Pathways in cancer                     | LAMA5 ITG A6 EDN1 HSP90AA1 HES1 EPO EGLN1 TCF7L1 GNAQ IL6R TGFA NKX3-1 NQO1 MMP1 LPAR1 CHUK RASSF5 |
| 0.0067         | 13     | 354           | 3,6             | PI3K-Akt signaling pathway             | LAMA5 ITG A6 NGFR HSP90AA1 EPO THBS1 CREB3L1 IL6R TGFA COL6A3 PRL LPAR1 CHUK                       |
| 0.0067         | 7      | 97            | 6,0             | Fluid shear stress and atherosclerosis | EDN1 HSP90AA1 PLAT BMPR1A NQO1 SRC CHUK                                                            |
| 0.0349         | 6      | 109           | 5,4             | HIF-1 signaling pathway                | EDN1 MKNK2 EPO EGLN1 ALDOA IL6R                                                                    |
| 0.0349         | 4      | 41            | 9,7             | Bladder cancer                         | HBEGF THBS1 MMP1 SRC                                                                               |

RNA-seq analysis of MDA-MB-231 Scramble (Scr) and UBIAD1-overexpressing (UBIAD1<sup>OE</sup>) cells. List of genes that have been found significantly altered through KEGG pathway analysis.

Supplementary Table 5

| Enrichment FDR | nGenes | Pathway Genes | Fold Enrichment | Pathways                                         | Genes                                                                                                                                                                                                                                  |
|----------------|--------|---------------|-----------------|--------------------------------------------------|----------------------------------------------------------------------------------------------------------------------------------------------------------------------------------------------------------------------------------------|
| 2.084E-05      | 19     | 450           | 4,5             | Extracellular matrix organization                | TNFRSF1B, TIE1, ITGA6, CCDC80, FERMT1, CST3, COL12A1, COL7A1, LRP1, SOX9, PDXN, LAMA5, ADAM19, THBS1, MMP14, CREB3L1, COL6A3, COL18A1, MMP1                                                                                            |
| 7.64409E-06    | 26     | 717           | 3,7             | Blood vessel development                         | NGFR, TIE1, TGFBR3, EDN1, NRP1, BMPR1A, HES1, EGFR, LRP1, C3, ID1, RAMP1, EGLN1, THBS1, MMP14, CREB3L1, IL6R, PLCD3, TGFA, ESM1, NKX3-1, PRL, COL18A1, NOG, TNFAIP2, ECSCR                                                             |
| 1.33003E-05    | 26     | 748           | 3,6             | Vasculature development                          | NGFR, TIE1, TGFBR3, EDN1, NRP1, BMPR1A, HES1, EGFR, LRP1, C3, ID1, RAMP1, EGLN1, THBS1, MMP14, CREB3L1, IL6R, PLCD3, TGFA, ESM1, NKX3-1, PRL, COL18A1, NOG, TNFAIP2, ECSCR                                                             |
| 7.64409E-06    | 29     | 886           | 3,4             | Tube morphogenesis                               | NGFR, TIE1, TGFBR3, EDN1, NRP1, BMPR1A, HES1, LRP1, SOX9, C3, ID1, LAMA5, RAMP1, EGLN1, THBS1, MMP14, CREB3L1, PLCD3, TGFA, ESM1, NKX3-1, ATOH8, PRL, COL18A1, NOG, TNFAIP2, SRC, TGM2, ECSCR                                          |
| 2.32527E-06    | 35     | 1122          | 3,2             | Enzyme linked receptor protein signaling pathway | VIM, PTPRU, NGFR, TIE1, TGFBR3, HSP90AA1, FKBP1A, NRP1, LGMN, FERMT1, PLAT, BMPR1A, MTR4, LPXN, HBEGF, HES1, EGFR, LRP1, PMEPA1, SOX9, ID1, THBS1, CGN, CREB3L1, TGFA, ESM1, NKX3-1, IGFBP6, ATOH8, PRL, GREM2, NOG, ARAP1, SRC, ENPP1 |

RNA-seq analysis of MDA-MB-231 Scramble (Scr) and UBIAD1-overexpressing (UBIAD1<sup>OE</sup>) cells. List of Biological Processes that have been found significantly altered through Gene Ontology enrichment analysis.



Uncropped blots corresponding to Suppl. Fig. 2f

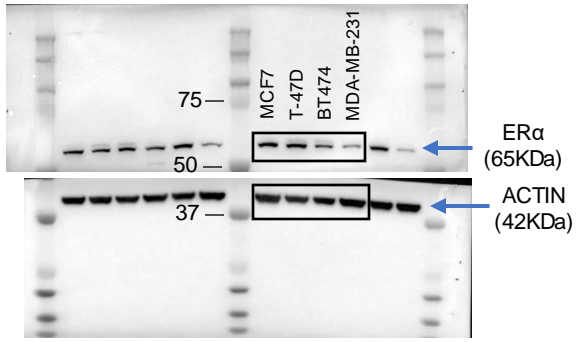

Uncropped blots corresponding to Suppl. Fig. 2h

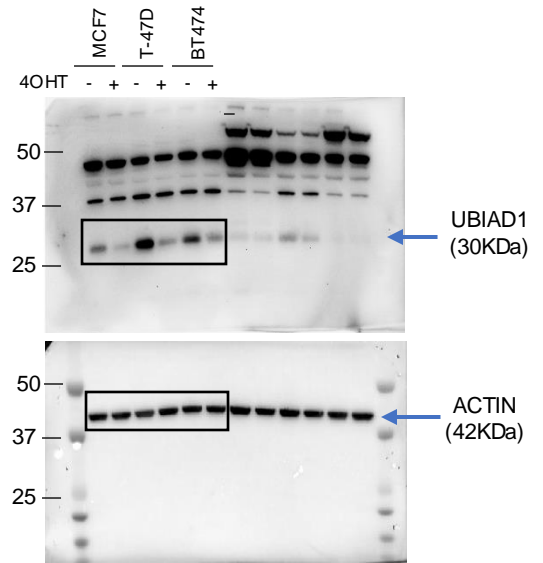

Uncropped blots corresponding to Suppl. Fig. 3c

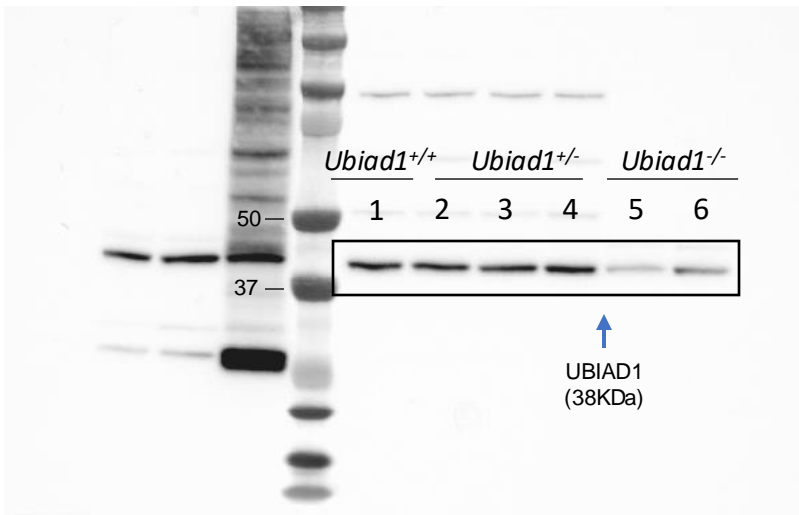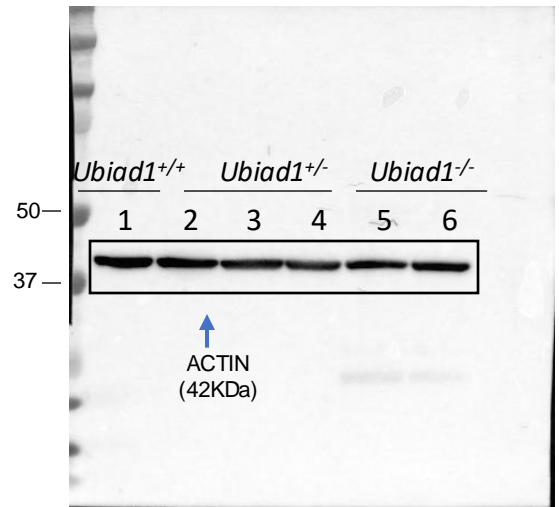

Uncropped blots corresponding to Suppl. Fig. 5a

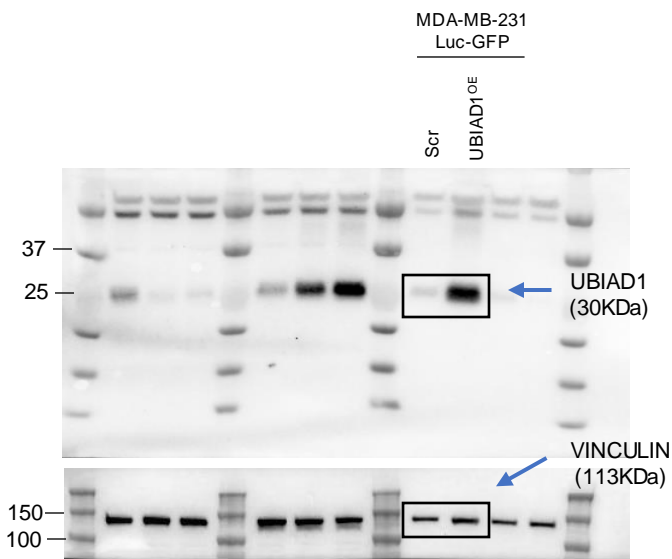

Uncropped blots corresponding to Suppl. Fig. 5c

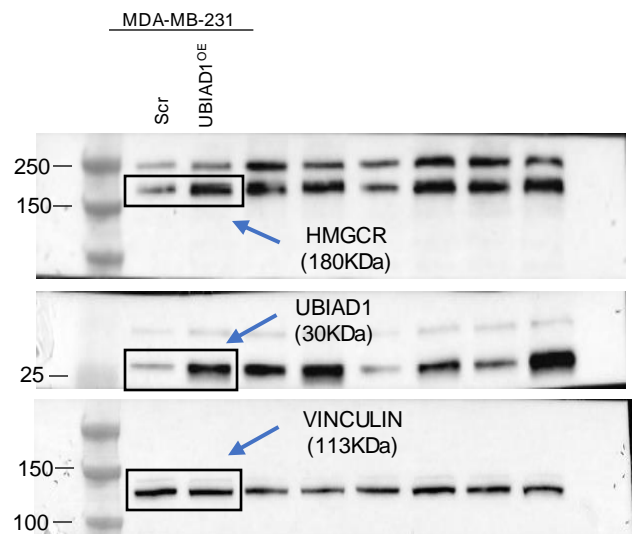

Uncropped blots corresponding to Suppl. Fig. 5g

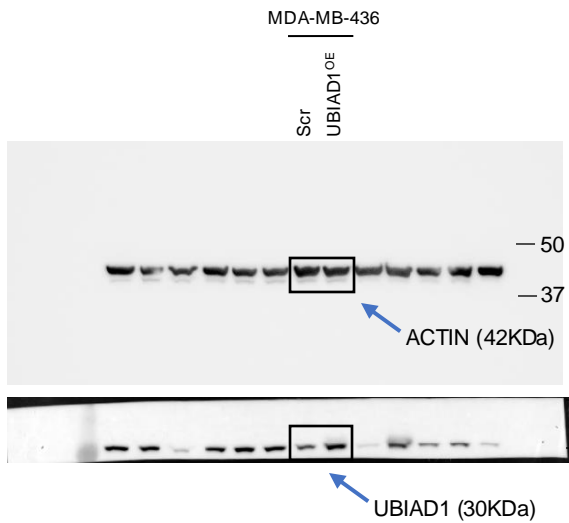

Uncropped blots corresponding to Suppl. Fig. 5k

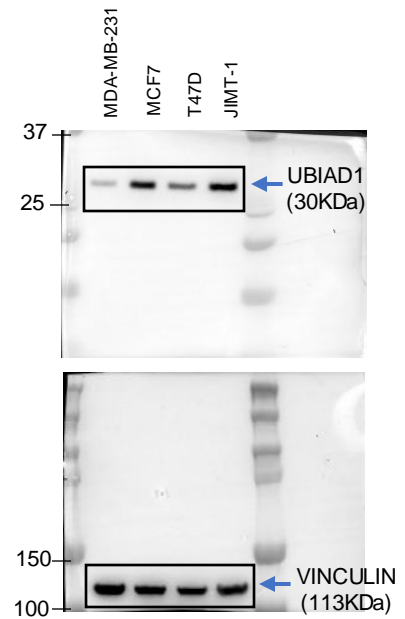

Uncropped blots corresponding to Suppl. Fig. 5l

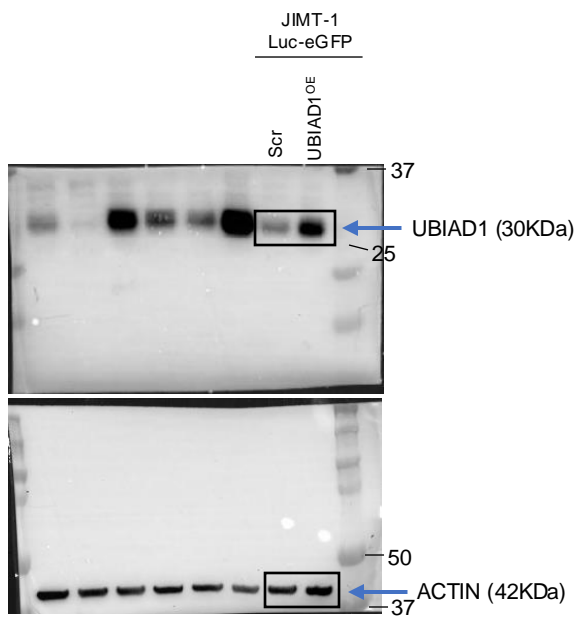

### Uncropped blots corresponding to Suppl. Fig. 6b

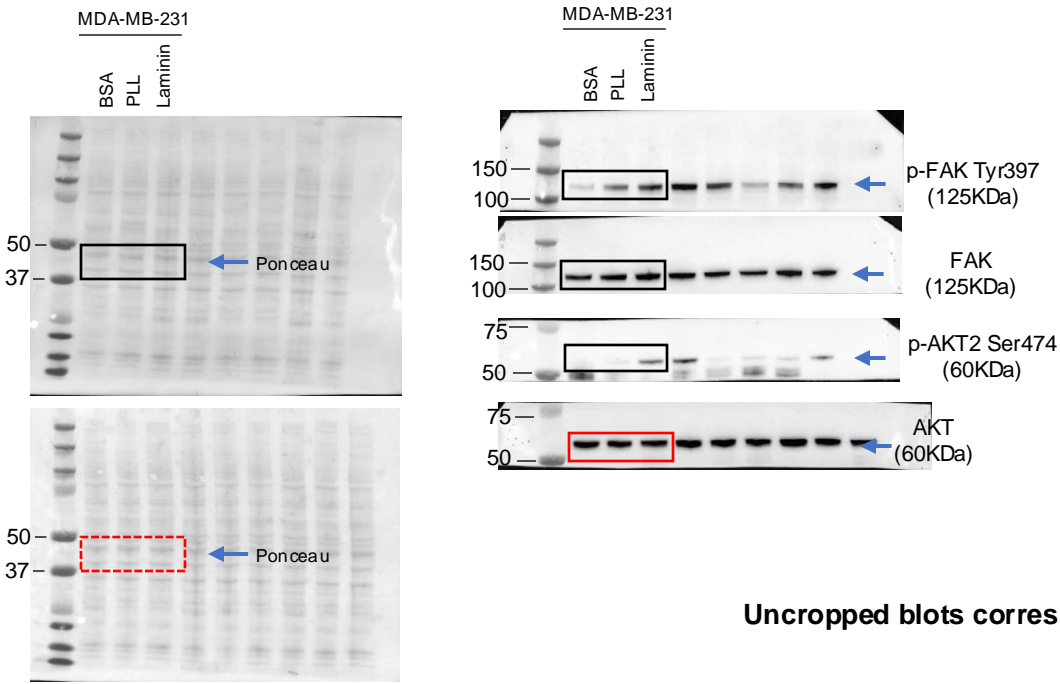

### Uncropped blots corresponding to Suppl. Fig. 7a

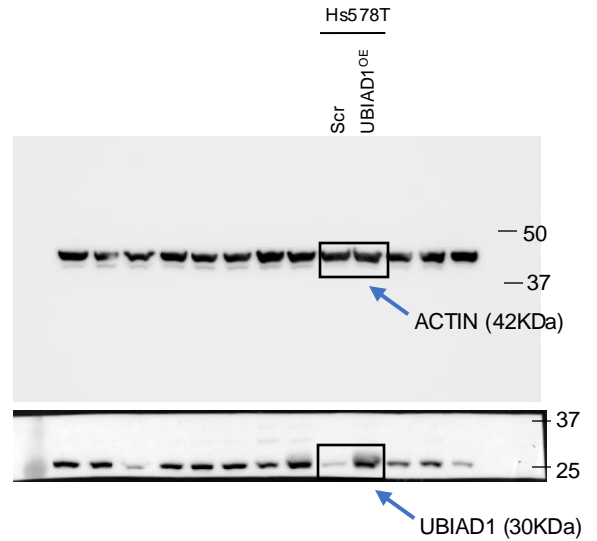

### Uncropped blots corresponding to Suppl. Fig. 6c

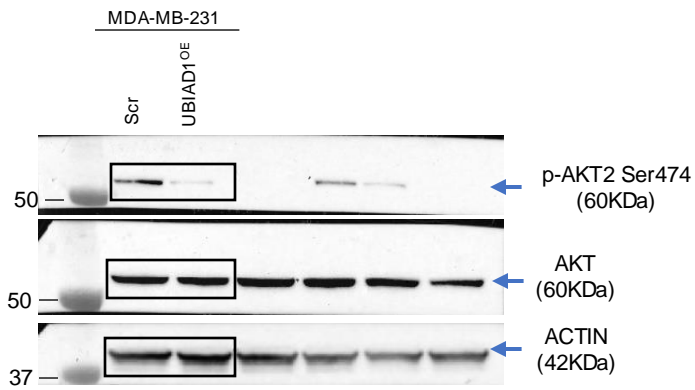

### Uncropped blots corresponding to Suppl. Fig. 7d

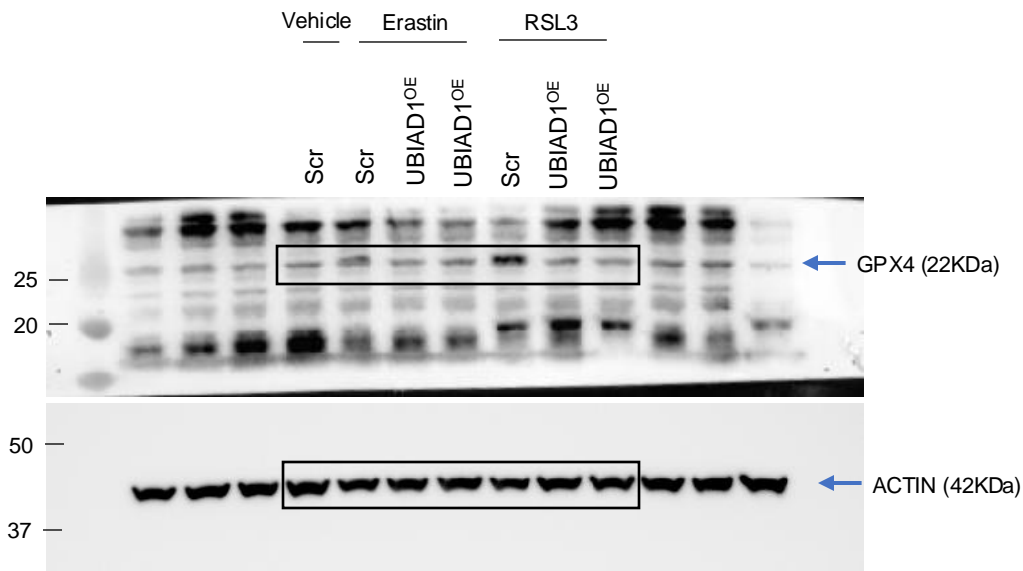

Uncropped blots corresponding to Suppl. Fig. 7h

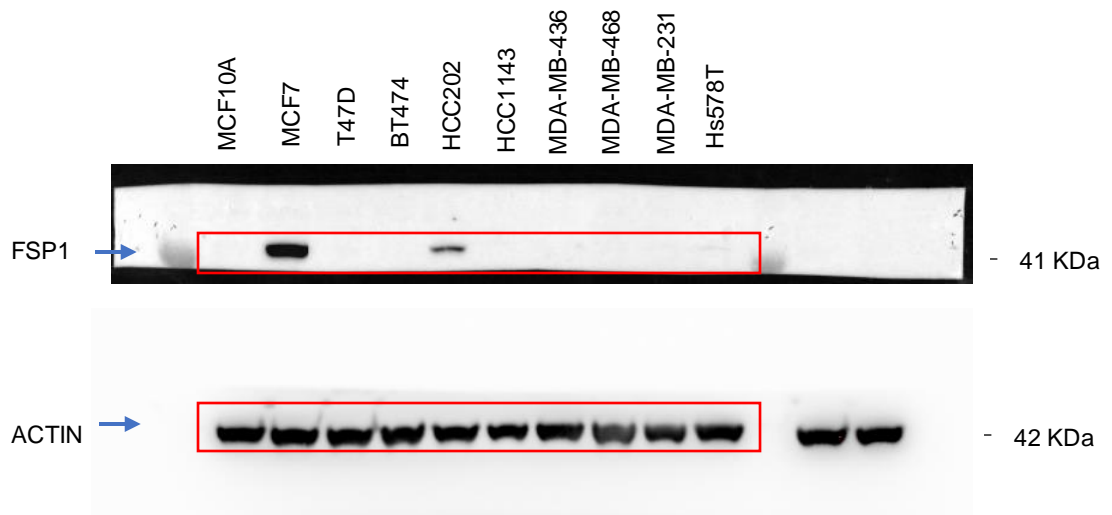

Supplement: 41467_2024_52523_MOESM1_ESM.pdf [file 41467_2024_52523_MOESM1_ESM.pdf]
